# Supplementary material
Source: MDPI journal article supplement (https://www.mdpi.com/2073-4352/12/5/737)
Supplement: s1 [file s1 › crystals-1677504-supplementary.pdf]

# The Crystal Structure of 2-Amino-4-(2,3-Dichlorophenyl)-6-Methoxy-4*H*-Benzo[*h*]chromene-3-Carbonitrile: Antitumor and Tyrosine Kinase Receptor Inhibition Mechanism Studies

Ahmed M. El-Agrody <sup>1,\*</sup>, Ahmed M. Fouda <sup>2</sup>, Hany M. Mohamed <sup>1,3</sup>, Mohammed Y. Alshahrani <sup>4</sup>,  
Hazem A. Ghabbour <sup>5</sup>, Abd El-Galil E. Amr <sup>6,7,\*</sup>, Rawda M. Okasha <sup>8</sup>, Ahmed M. Naglah <sup>6,7</sup>,  
Abdulrahman A. Almehizia <sup>6</sup> and Ahmed A. Elhenawy <sup>1,9,\*</sup>

<sup>1</sup> Chemistry Department, Faculty of Science, Al-Azhar University, Nasr City, Cairo 11884, Egypt; hanysm83@yahoo.com

<sup>2</sup> Chemistry Department, Faculty of Science, King Khalid University, Abha 61413, Saudi Arabia; amfouda@hotmail.com

<sup>3</sup> Chemistry Department, Faculty of Science, Jazan University, Jazan 45142, Saudi Arabia

<sup>4</sup> Department of Clinical Laboratory Science, College of Applied Medical Science, King Khalid University, Abha 61413, Saudi Arabia; moyahya@kku.edu.sa

<sup>5</sup> Department of Medicinal Chemistry, Faculty of Pharmacy, University of Mansoura, Mansoura 35516, Egypt; ghabbourh@yahoo.com

<sup>6</sup> Pharmaceutical Chemistry Department, Drug Exploration and Development Chair (DEDC), College of Pharmacy, King Saud University, Riyadh 11451, Saudi Arabia; anaglah@ksu.edu.sa (A.M.N.); mehizia@ksu.edu.sa (A.A.A.)

<sup>7</sup> Applied Organic Chemistry Department, National Research Centre, Giza 12622, Egypt

<sup>8</sup> Chemistry Department, Faculty of Science, Taibah University, Medina 30002, Saudi Arabia; rawdao@yahoo.com

<sup>9</sup> Chemistry Department, Faculty of Science and Art, AlBaha University, Al Bahah 65731, Saudi Arabia

\* Correspondence: elagrody\_am@azhar.edu.eg (A.M.E.-A.); aamr@ksu.edu.sa (A.E.-G.E.A.); elhenawy\_sci@hotmail.com (A.A.E.)

### 3.1. Materials and Equipment's

All chemicals were purchased from Sigma-Aldrich Chemical Co. (Sigma-Aldrich Corp., St. Louis, MO, USA). All melting points were measured with a Stuart Scientific Co. Ltd apparatus are uncorrected. The IR spectra were recorded on a Jasco FT/IR 460 plus spectrophotometer. The  $^1\text{H}$  NMR (500 MHz) and  $^{13}\text{C}$  NMR (125 MHz) spectra was measured on BRUKER AV 500 MHz spectrometer in  $\text{DMSO-d}_6$  as a solvent, using tetramethylsilane (TMS) as an internal standard, and chemical shifts were expressed as  $\delta$  (ppm). The Microwave apparatus used is Milestone Sr1, Microsynth. The mass spectrum was determined on a Shimadzu GC/MS-QP5050A spectrometer. Elemental analysis was carried out at the Regional Centre for Mycology and Biotechnology (RCMP), Al-Azhar University, Cairo, Egypt, and the results were within  $\pm 0.25\%$ . Reaction courses and product mixtures were routinely monitored by thin layer chromatography (TLC) on silica gel precoated F<sub>254</sub> Merck plates.

### 3.2. Synthesis of 2-Amino-4-(2,3-dichlorophenyl)-6-methoxy-4H-benzo[h]chromene-3-carbonitrile (4)

The two minutes at 140 °C are the optimum microwave irradiation condition which was used reacted of 4-methoxynaphthalenol (**1**; 0.01 mol), 2,3-dichlorobenzaldehyde (**2**; 0.01 mol) in presence of malononitrile (**3**; 0.01 mol) with catalytic amount of piperidine (0.5 ml) in ethanol (25 ml). After completion of the reaction, the reaction mixture was cooled to room temperature and the precipitated solid was filtered off, washed with methanol, and was recrystallized from ethanol to give compound **4** as colorless crystals; yield 92 %; m.p. 287-288 °C; (Literature procedure, reflux condition, yield 84%; m.p. 285–286 °C [52]).

### 3.3. Biological Screening

#### 3.3.1. Cell Culture

The tumor cell lines MCF-7, HepG-2, and PC-3 were obtained from the American Type Culture Collection (ATCC, Rockville, MD). The cells were grown on RPMI-1640 medium supplemented with 10 % inactivated fetal calf serum and 50  $\mu\text{g/ml}$  gentamycin. The cells were maintained at 37 °C in a humidified atmosphere with 5 %  $\text{CO}_2$  and were subculture two to three times a week.

#### 3.3.2. Cytotoxicity Evaluation Using Viability Assay

The cytotoxic activity was appraised, using the 3-(4,5-dimethylthiazol-2-yl)-2,5-diphenyltetrazolium bromide (MTT) colorimetric assay, as reported previously [51].

#### 3.3.3. In Vitro Tyrosine Kinases Inhibition

##### 3.3.3.1. EGFR Inhibition Activities

Target compounds were measured using the EGFR kinase assay kit (Cat. #40321, BPS bioscience). The detection kit is a luminescence kinase detection approach that detects the amount of ADP produced by the kinase reaction. After ADP is converted into ATP, ATP can be used as the substrate of the luciferase-catalyzed reaction to generate an optical signal, which is positively correlated with kinase activity.

##### 3.3.3.2. VEGFR-2 Inhibition Activities

Target compounds were used for evaluating their VEGFR-2 inhibition activities as mentioned above using VEGF-2 Receptor 2Kinase Assay Kit (Cat. #7788, Cell Signaling Technology).

**Figure S1: <sup>1</sup>H NMR of compound 4**

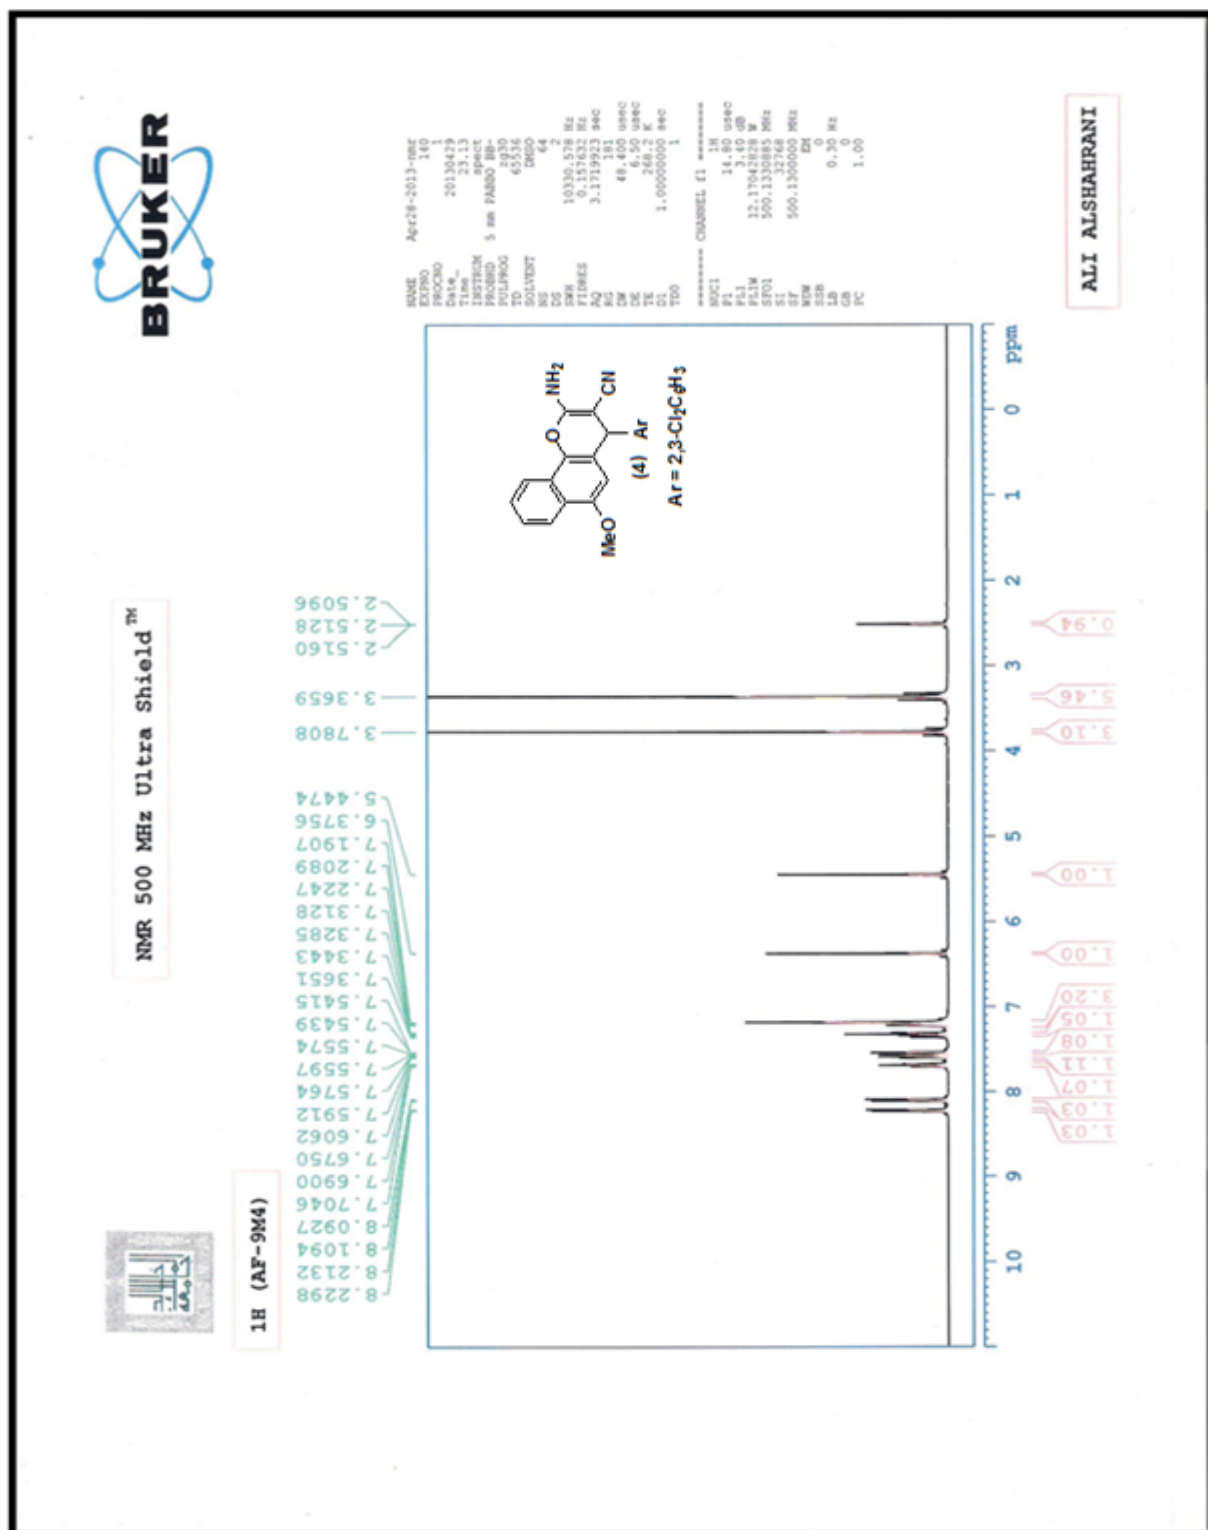

**Figure S2:  $^1\text{H}$  NMR 8-6 ppm of compound 4**

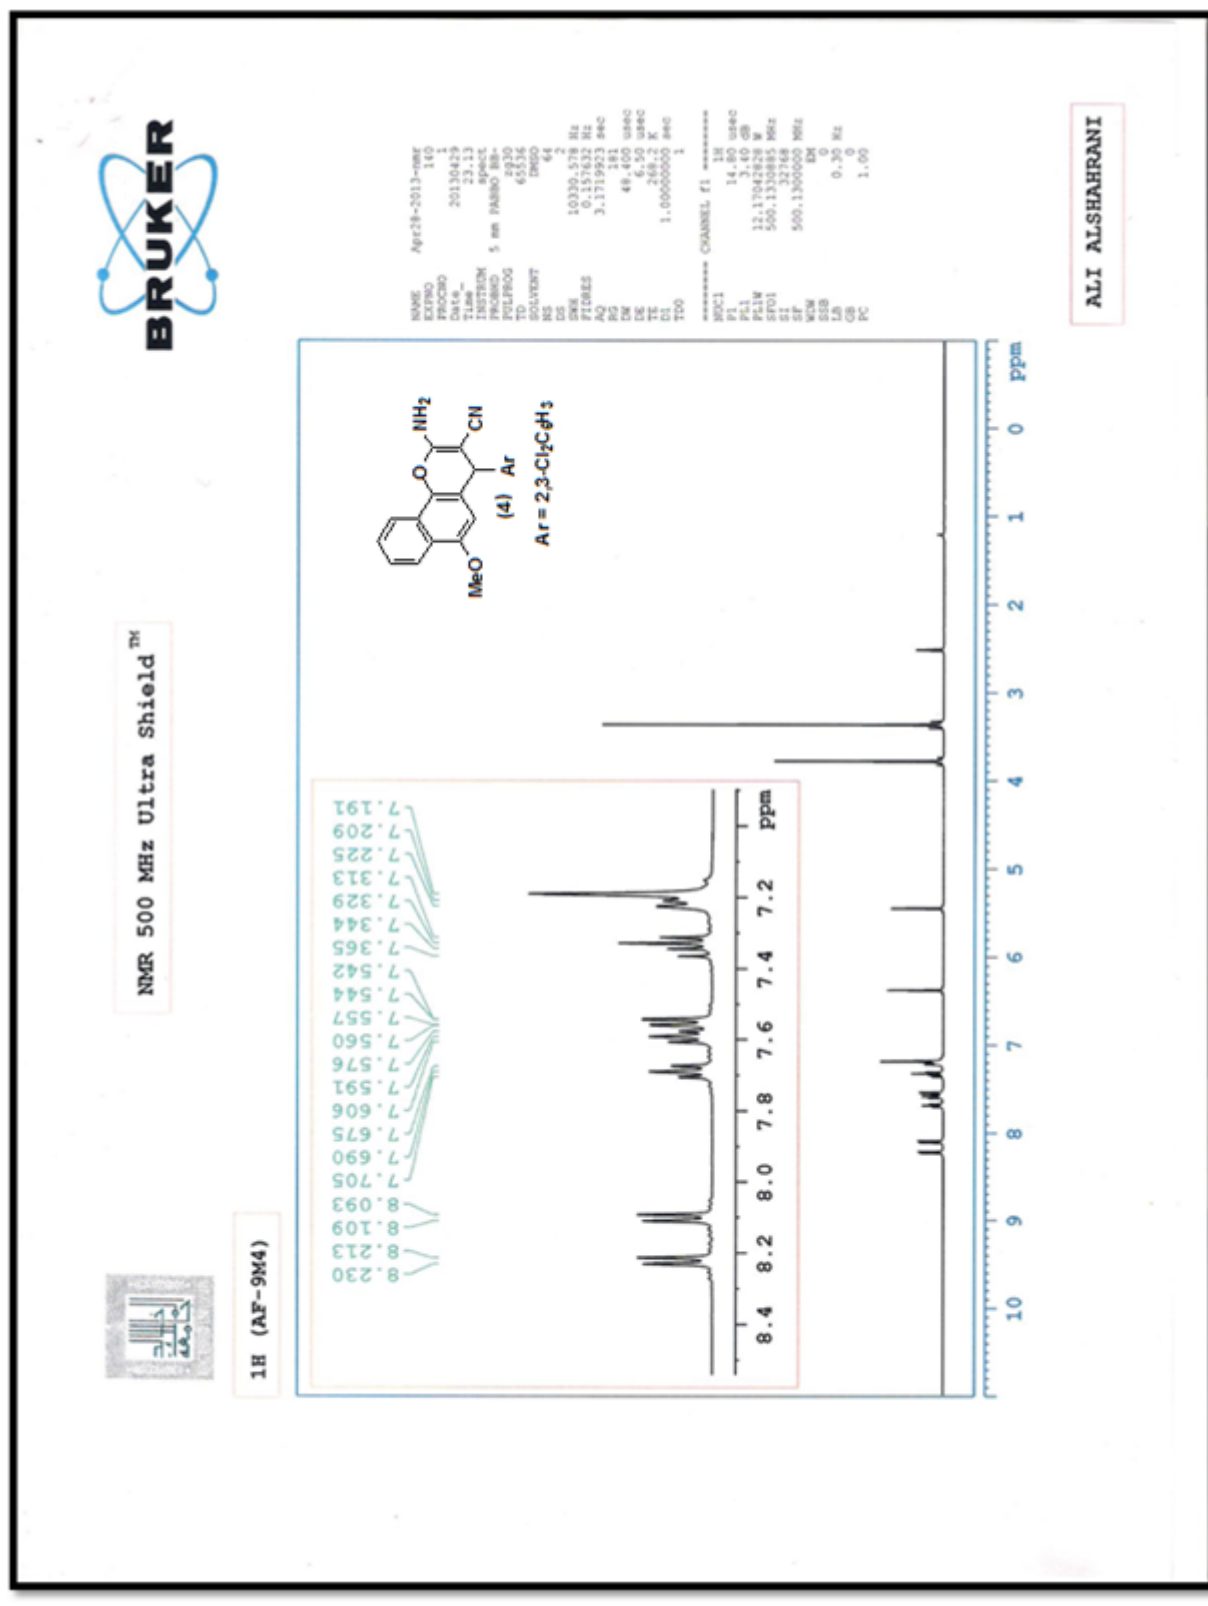

Figure S3:  $^{13}\text{C}$  NMR of compound 4

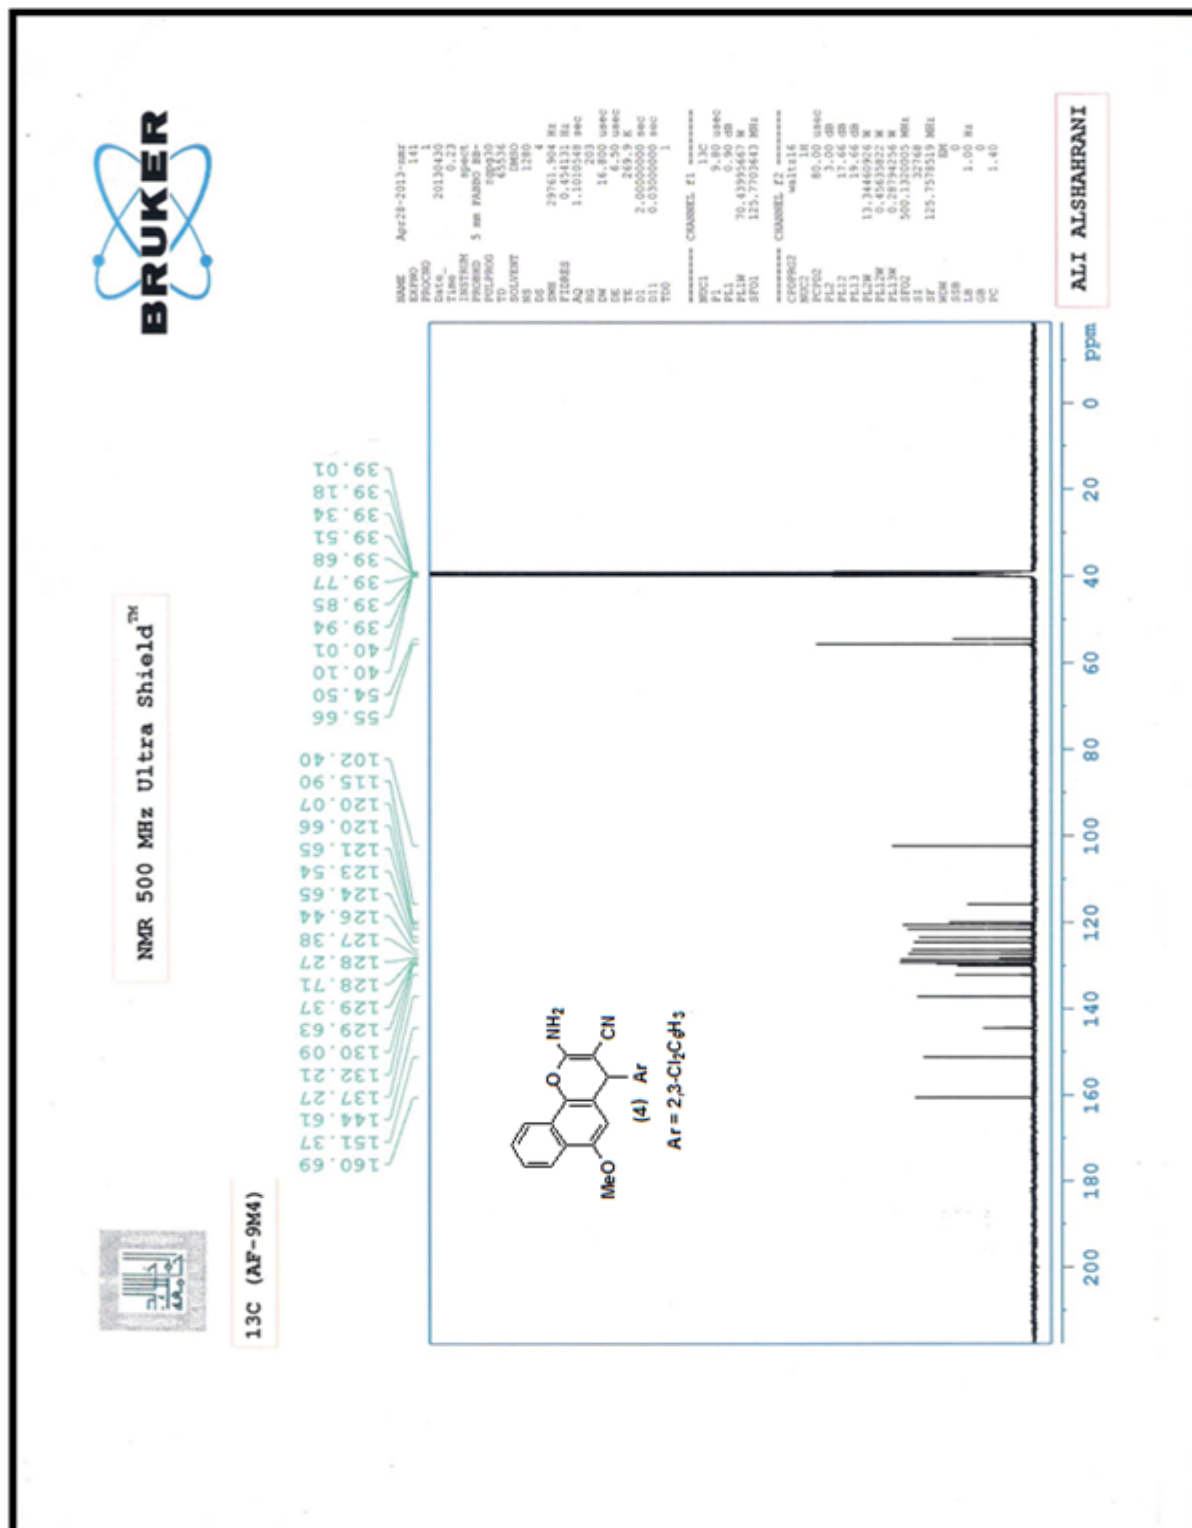

Figure S4: <sup>13</sup>CNMR-DPT 45 of compound 4

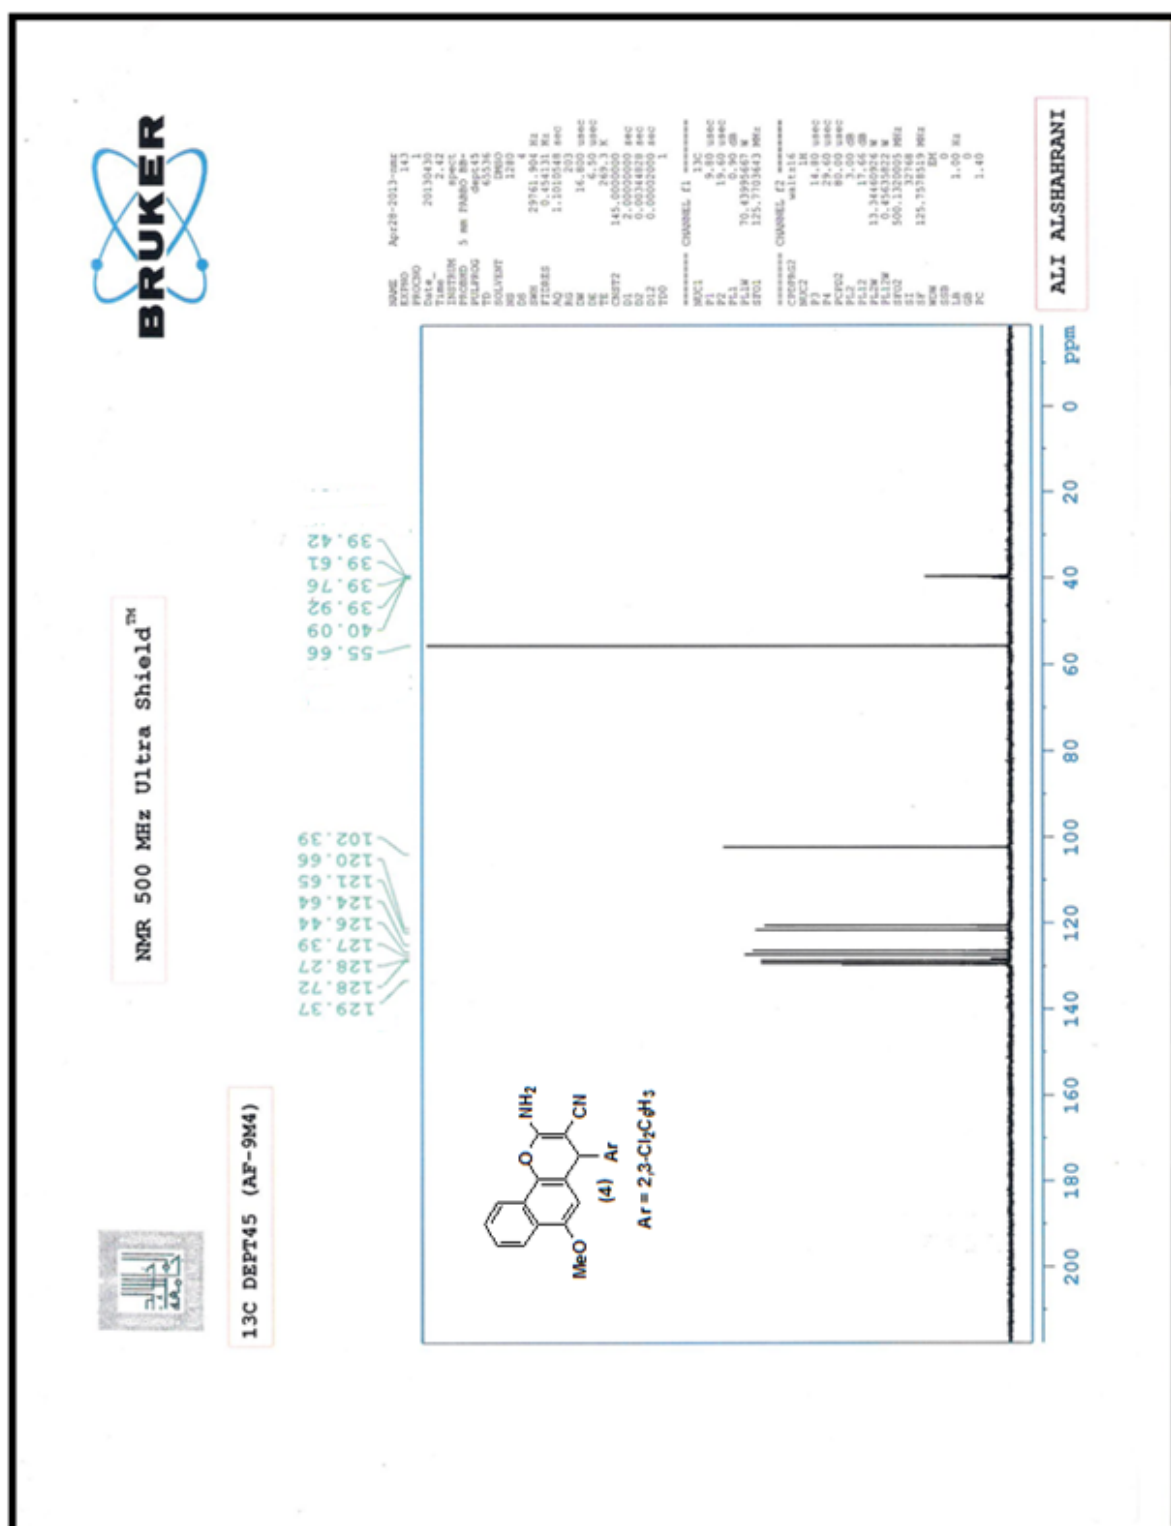

Figure S5:  $^{13}\text{C}$ NMR-DPT 90 of compound 4

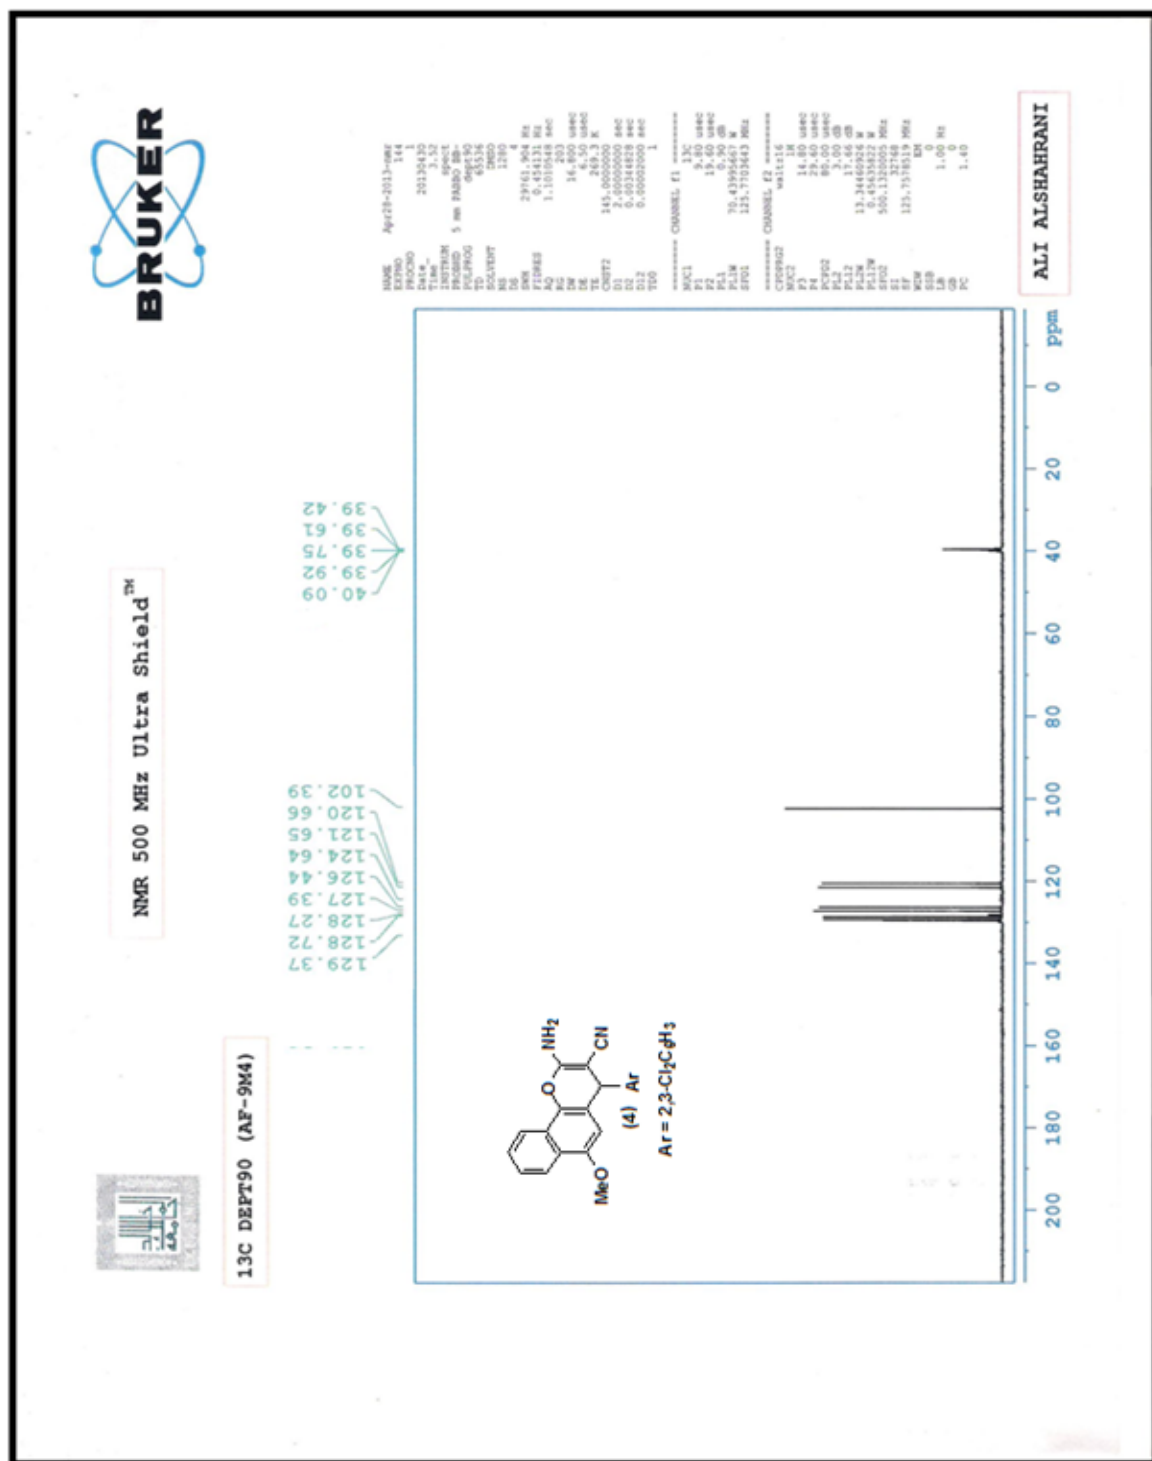

**Figure S6:  $^{13}\text{C}$  NMR-DPT 135 of compound 4**

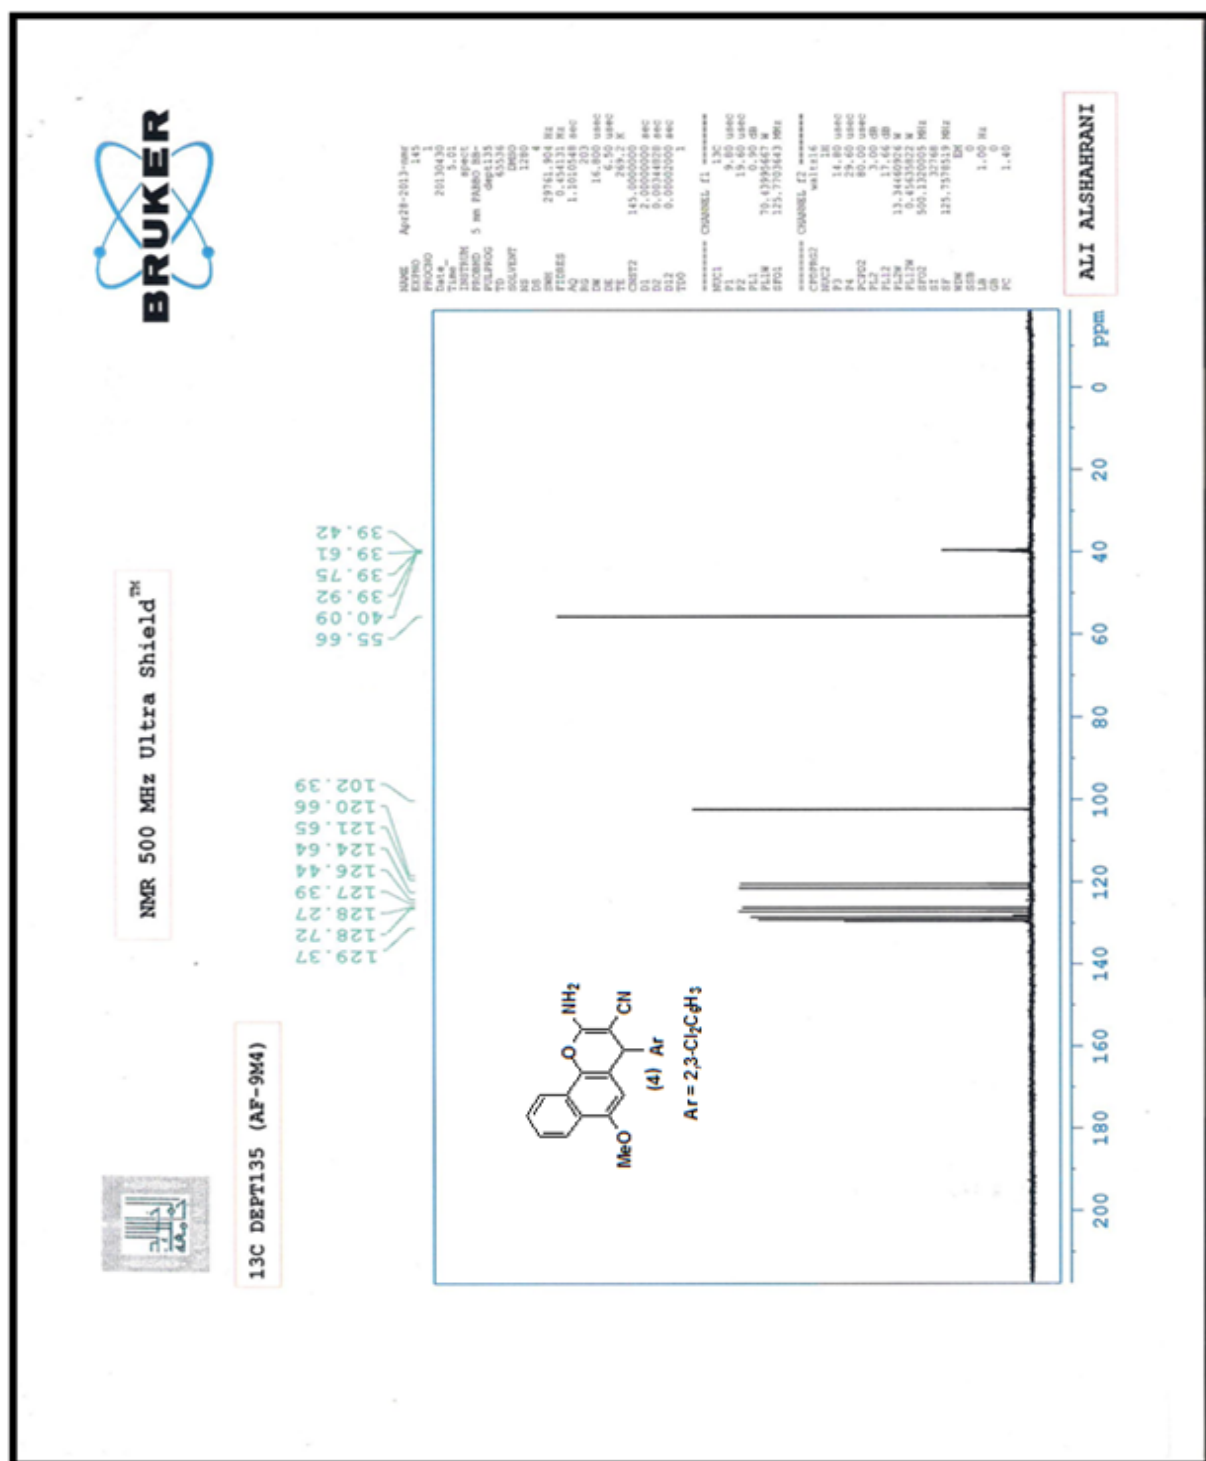

**Figure S7:  $^{13}\text{C}$ NMR-APT of compound 4**

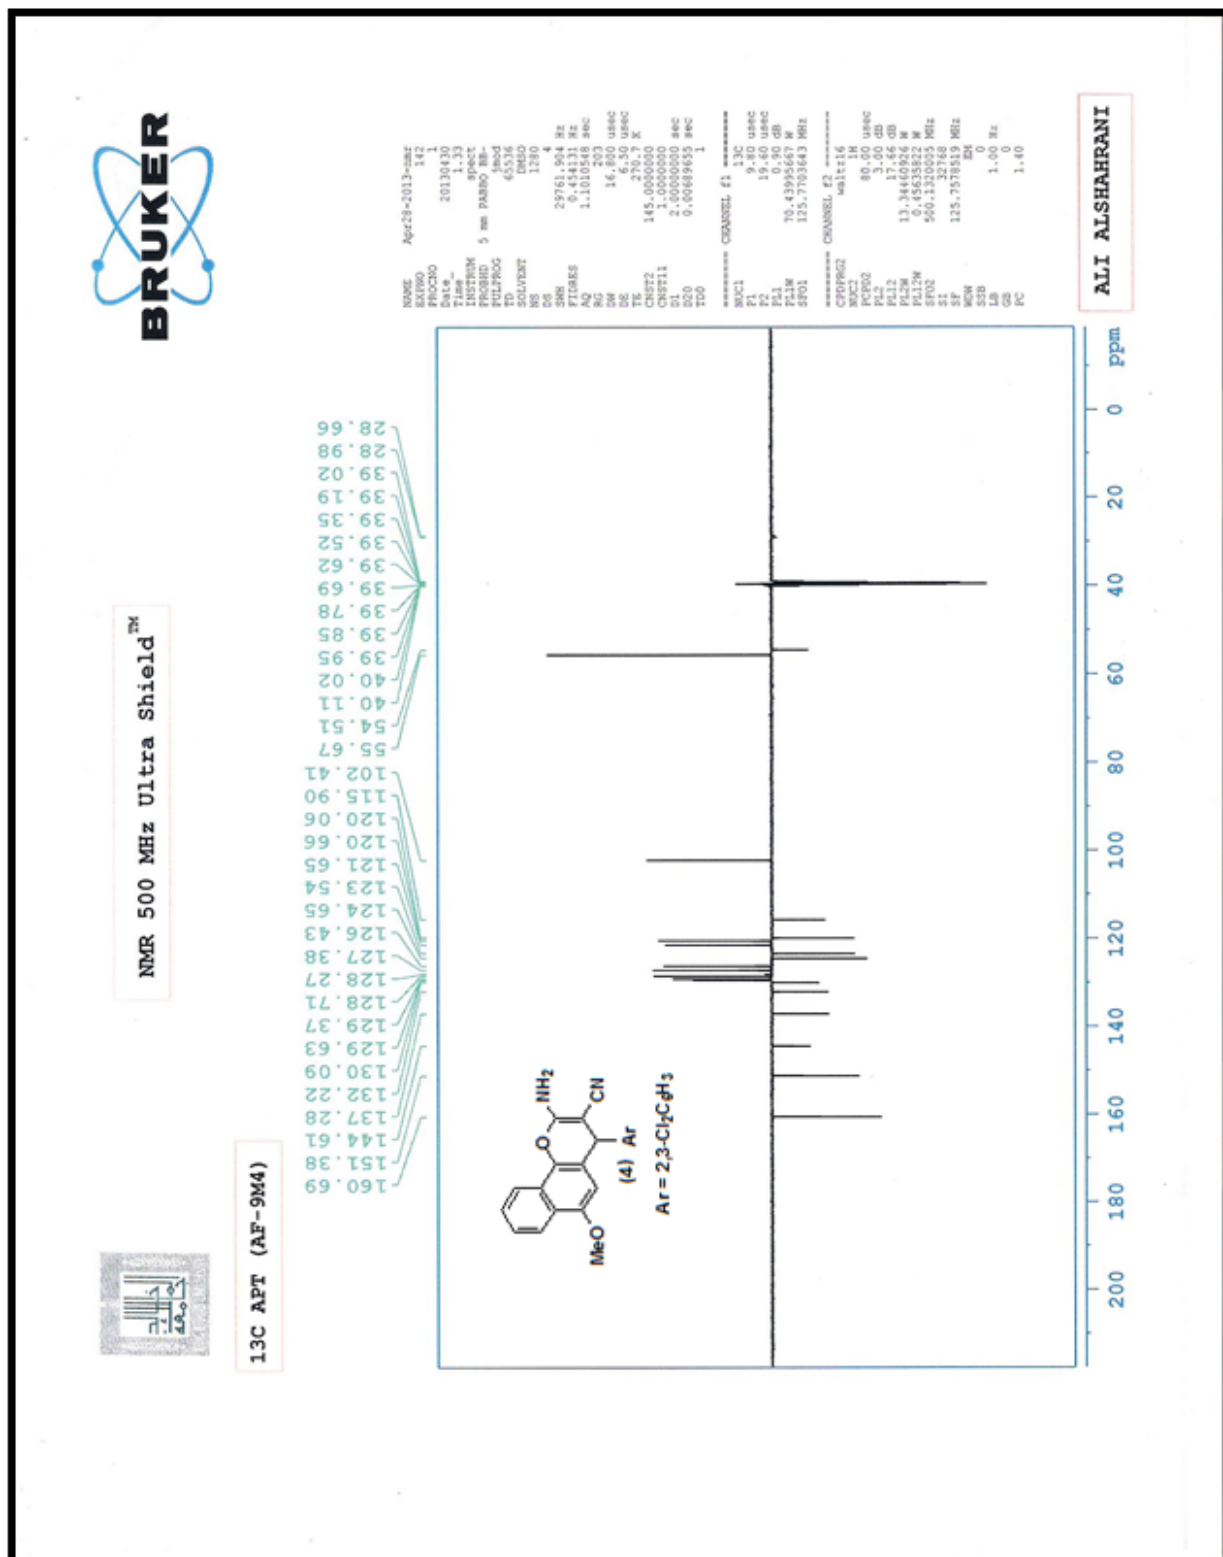

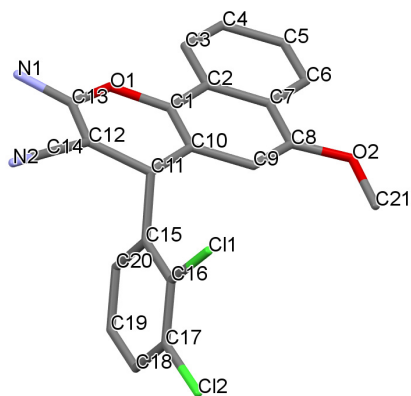

**Figure S8:** The number of atoms for compound **4** viewed along the *a*-axis direction.

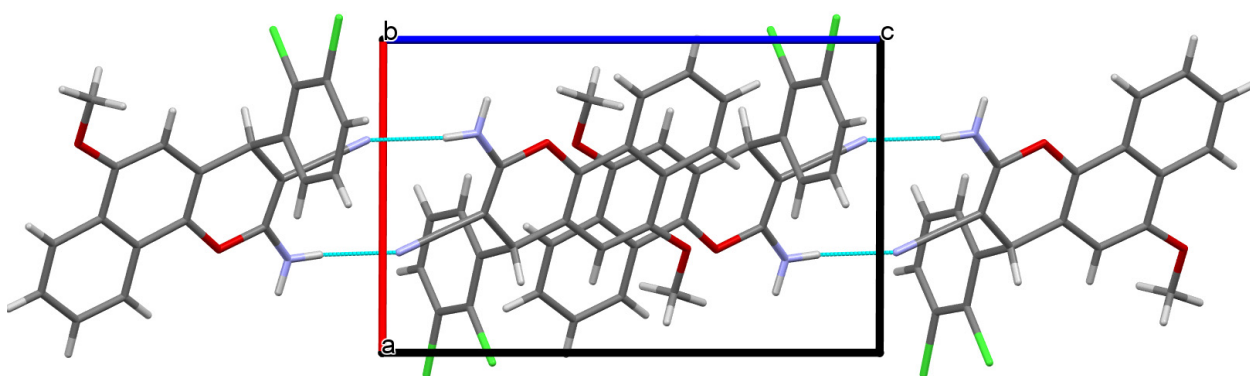

**Figure S9:** Packing viewed along the *b*-axis direction with C—H...N hydrogen bonds shown as light purple dashed lines.

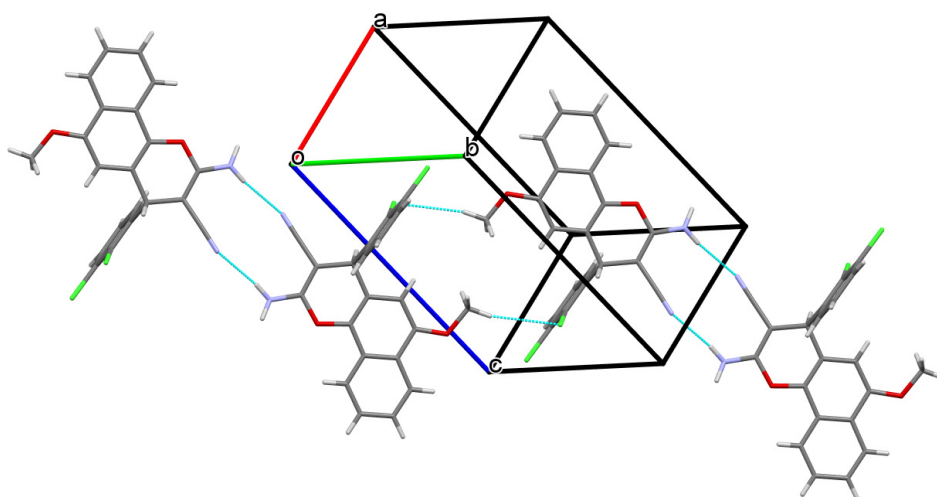

**Figure S10:** Detail of the intermolecular interactions forming one chain viewed along the *b*-axis direction. N—H...N and Cl...H—O hydrogen bonds are shown by blue dashed lines.

**Table S1:** The selected experimental and theoretical geometrical parameters for compound **4**.

| Atoms             | Å         |         | Atoms             | Angle (°) |         |
|-------------------|-----------|---------|-------------------|-----------|---------|
| C(30)-C(32)       | 1.374     | 0.93    | C(19)-C(21)-C(7)  | 118.883   | 118.857 |
| C(29)-C(30)       | 1.374     | 1.374   | C(21)-C(19)-C(18) | 120.607   | 120.662 |
| C(28)-C(29)       | 1.404     | 1.404   | C(21)-C(7)-O(3)   | 123.193   | 119.709 |
| C(27)-C(28)       | 1.401     | 1.399   | C(22)-C(21)-C(19) | 118.876   | 118.914 |
| C(27)-C(34)       | 1.4       | 1.401   | C(22)-C(21)-C(7)  | 122.241   | 122.23  |
| C(24)-C(26)       | 1.411     | 1.411   | C(24)-C(22)-C(21) | 109.524   | 109.474 |
| C(24)-C(25)       | 1.342     | 1.341   | C(24)-C(25)-N(5)  | 127.779   | 127.792 |
| C(22)-C(27)       | 1.525     | 1.521   | C(24)-C(25)-O(3)  | 122.538   | 122.503 |
| C(21)-C(22)       | 1.511     | 1.511   | C(24)-C(26)-N(6)  | 179.106   | 179.229 |
| C(19)-C(21)       | 1.421     | 0.929   | C(25)-C(24)-C(22) | 123.675   | 123.746 |
| C(18)-C(19)       | 1.362     | 1.362   | C(26)-C(24)-C(22) | 118.176   | 118.447 |
| C(17)-C(18)       | 1.425     | 1.426   | C(26)-C(24)-C(25) | 118.1     | 118.082 |
| C(8)-C(17)        | 1.421     | 1.421   | C(27)-C(22)-C(21) | 110.754   | 110.762 |
| C(8)-C(9)         | 1.395     | 1.395   | C(27)-C(22)-C(24) | 111.556   | 111.561 |
| C(7)-C(8)         | 1.422     | 1.351   | C(27)-C(28)-Cl(1) | 120.216   | 120.203 |
| C(7)-C(21)        | 1.35      | 1.422   | C(28)-C(27)-C(22) | 122.458   | 122.422 |
| N(6)-C(26)        | 1.146     | 1.147   | C(28)-C(27)-C(34) | 118.125   | 120.216 |
| N(5)-C(25)        | 1.34      | 1.34    | C(28)-C(29)-Cl(2) | 120.238   | 119.836 |
| O(4)-C(36)        | 1.378     | 1.378   | C(29)-C(28)-C(27) | 119.865   | 119.951 |
| O(4)-C(18)        | 1.37      | 1.369   | C(29)-C(28)-Cl(1) | 119.909   | 120.879 |
| O(3)-C(7)         | 1.396     | 1.367   | C(30)-C(29)-C(28) | 120.911   | 118.884 |
| O(3)-C(25)        | 1.367     | 1.396   | C(30)-C(29)-Cl(2) | 118.831   | 119.245 |
| Cl(2)-C(29)       | 1.729     | 1.728   | C(32)-C(30)-C(29) | 119.207   | 120.424 |
| Cl(1)-C(28)       | 1.728     | 1.727   | C(32)-C(34)-C(27) | 120.684   | 120.678 |
| Atoms             | Angle (°) |         | C(34)-C(27)-C(22) | 119.401   | 119.41  |
| C(11)-C(9)-C(8)   | 121.312   | 121.37  | C(34)-C(32)-C(30) | 121.192   | 118.15  |
| C(13)-C(11)-C(9)  | 119.564   | 119.582 | C(8)-C(7)-C(21)   | 123.015   | 121.195 |
| C(15)-C(13)-C(11) | 120.298   | 120.281 | C(8)-C(7)-O(3)    | 113.791   | 119.003 |
| C(15)-C(17)-C(8)  | 117.789   | 117.825 | C(9)-C(8)-C(7)    | 123.157   | 113.824 |
| C(17)-C(15)-C(13) | 121.888   | 121.877 | N(5)-C(25)-O(3)   | 109.683   | 123.201 |
| C(17)-C(18)-O(4)  | 113.923   | 113.948 |                   |           |         |
| C(17)-C(8)-C(7)   | 117.691   | 117.731 |                   |           |         |
| C(17)-C(8)-C(9)   | 119.138   | 119.055 |                   |           |         |
| C(18)-C(17)-C(15) | 123.483   | 123.473 |                   |           |         |
| C(18)-C(17)-C(8)  | 118.727   | 118.701 |                   |           |         |
| C(19)-C(18)-C(17) | 121.05    | 121.032 |                   |           |         |

**Table S2:** Topological parameters at BCP of compound **4** [Electron density( $\rho(r)$ ), Laplacian of electron density ( $\nabla^2\rho(r)$ ), Ellipticity ( $\epsilon$ ), Hamiltonian form of Kinetic energy density ( $K(r)$ ) and distance ( $D$ , in  $\text{\AA}$ ) of Bond Path Length (BPL) from the nuclear attractors].

|            | $\rho(r)a.u$ | $\nabla^2\rho(r)a.u$ | $\epsilon$ | $K.a.u$  | $D(\text{\AA})$ |
|------------|--------------|----------------------|------------|----------|-----------------|
| N1 - H2    | 0.327489     | -1.52709             | 0.085791   | 0.455229 | 0.002522        |
| N1 - H3    | 0.327556     | -1.50409             | 0.087249   | 0.451174 | 0.002453        |
| N1 - C4    | 0.288882     | -0.0066              | 0.228124   | 0.41235  | 0.007355        |
| C4 - O5    | 0.263211     | 0.036117             | 0.111542   | 0.337036 | 0.004804        |
| C4 - C6    | 0.298624     | -0.20094             | 2.708324   | 0.428247 | 0.00057         |
| O5 - C7    | 0.237524     | 0.250112             | 0.309196   | 0.285876 | 0.005693        |
| C7 - C11   | 0.309223     | -0.79706             | 0.552241   | 0.383797 | 0.00163         |
| C8 - C11   | 0.249069     | -0.67658             | 0.039228   | 0.236678 | 0.000262        |
| C8 - H12   | 0.271667     | -0.70883             | 0.00492    | 0.242775 | 0.000123        |
| C6 - C8    | 0.243256     | -0.6368              | 0.105404   | 0.227134 | 0.000393        |
| C11 - C17  | 0.281558     | -0.77386             | 0.277561   | 0.295408 | 0.000056        |
| C6 - C9    | 0.262557     | -0.32318             | 0.970567   | 0.333775 | 0.00008         |
| H12 - Cl26 | 0.014806     | 0.075518             | 0.748092   | -0.00329 | 0.061882        |
| C7 - C10   | 0.281406     | -0.77548             | 0.243039   | 0.299279 | 0.000468        |
| C8 - C13   | 0.243369     | -0.63344             | 0.016977   | 0.227247 | 0.000087        |
| C9 - N14   | 0.403717     | 0.928625             | 0.106799   | 0.735645 | 0.000048        |
| C10 - C15  | 0.292662     | -0.82335             | 0.267002   | 0.320268 | 0.000081        |
| C10 - C16  | 0.284261     | -0.7799              | 0.292049   | 0.298748 | 0.000147        |
| C16 - C23  | 0.280857     | -0.78329             | 0.231475   | 0.29465  | 0.000319        |
| C23 - O32  | 0.257647     | 0.152711             | 0.167536   | 0.327188 | 0.006952        |
| C16 - C22  | 0.285631     | -0.79706             | 0.246656   | 0.303183 | 0.000074        |
| C17 - C23  | 0.303374     | -0.75103             | 0.616144   | 0.375308 | 0.001177        |
| C13 - C18  | 0.285999     | -0.7357              | 0.36126    | 0.32286  | 0.001577        |
| C13 - C19  | 0.290738     | -0.7984              | 0.32124    | 0.312705 | 0.000054        |
| C15 - C21  | 0.304232     | -0.84497             | 0.424738   | 0.337062 | 0.000046        |
| C15 - H20  | 0.265264     | -0.67403             | 0.037604   | 0.236648 | 0.00003         |
| C22 - C29  | 0.315311     | -0.89518             | 0.437489   | 0.35911  | 0.000103        |
| C21 - C29  | 0.28966      | -0.81781             | 0.256048   | 0.309278 | 0.000084        |
| C22 - H31  | 0.265992     | -0.68314             | 0.029201   | 0.236771 | 0.000036        |
| O32 - C37  | 0.255098     | 0.087935             | 0.024696   | 0.319135 | 0.006701        |
| C17 - H24  | 0.264453     | -0.65809             | 0.06862    | 0.236102 | 0.000023        |
| C18 - C25  | 0.28683      | -0.76983             | 0.424642   | 0.303376 | 0.004138        |
| C18 - Cl26 | 0.187235     | -0.29691             | 0.064237   | 0.145481 | 0.000026        |
| C19 - C27  | 0.299031     | -0.83889             | 0.348092   | 0.327069 | 0.000061        |
| C19 - H28  | 0.264993     | -0.67568             | 0.035934   | 0.23616  | 0.000031        |
| C21 - H30  | 0.264287     | -0.67137             | 0.029659   | 0.236282 | 0.000005        |
| C25 - C33  | 0.297704     | -0.73854             | 0.411689   | 0.370277 | 0.001104        |
| C27 - C33  | 0.301742     | -0.85438             | 0.334388   | 0.335049 | 0.000097        |
| C25 - Cl34 | 0.187407     | -0.29996             | 0.056832   | 0.145693 | 0.000587        |
| C27 - H35  | 0.265315     | -0.68117             | 0.027416   | 0.236477 | 0.000007        |

|                  |          |          |          |          |          |
|------------------|----------|----------|----------|----------|----------|
| <b>C29 - H36</b> | 0.26457  | -0.6702  | 0.032483 | 0.236688 | 0.000016 |
| <b>C33 - H38</b> | 0.2655   | -0.68713 | 0.0358   | 0.235391 | 0.000059 |
| <b>C37 - H39</b> | 0.269005 | -0.71392 | 0.043523 | 0.240042 | 0.000277 |
| <b>C37 - H40</b> | 0.269382 | -0.69482 | 0.045878 | 0.24134  | 0.000479 |
| <b>C37 - H41</b> | 0.269455 | -0.69635 | 0.046146 | 0.241269 | 0.000338 |

**Table S3.** Crystal data and structure refinement parameters for compound **4**.

|                                                                                 |                                                                               |
|---------------------------------------------------------------------------------|-------------------------------------------------------------------------------|
| <b>Crystal data</b>                                                             |                                                                               |
| <b>Chemical formula</b>                                                         | C <sub>21</sub> H <sub>14</sub> Cl <sub>2</sub> N <sub>2</sub> O <sub>2</sub> |
| <b>Formula weight</b>                                                           | 397.24                                                                        |
| <b>Crystal system, space group</b>                                              | Triclinic, P -1 (2)                                                           |
| <b>Temperature (K)</b>                                                          | 293                                                                           |
| <b>a, b, c (Å)</b>                                                              | 7.8561(4), 9.2701(5), 12.8343(7)                                              |
| <b>V (Å<sup>3</sup>)</b>                                                        | 910.31(9)                                                                     |
| <b>Z</b>                                                                        | 2                                                                             |
| <b>Radiation type</b>                                                           | Mo Kα                                                                         |
| <b>μ (mm<sup>-1</sup>)</b>                                                      | 3.368                                                                         |
| <b>Crystal size (mm)</b>                                                        | 0.556 × 0.143 × 0.974                                                         |
| <b>Data collection</b>                                                          |                                                                               |
| <b>Diffractometer</b>                                                           | Bruker APEX-II D8 venture diffractometer                                      |
| <b>Absorption correction</b>                                                    | Multi-scan, SADABS Bruker 2018                                                |
| <b>Tmin, Tmax</b>                                                               | 0.417, 0.501                                                                  |
| <b>No. of measured, independent and observed<br/>[I &gt; 2σ(I)] reflections</b> | 1647, 2993, 3181                                                              |
| <b>Rint</b>                                                                     | 0.049                                                                         |
| <b>Refinement</b>                                                               |                                                                               |
| <b>R[F<sub>2</sub> &gt; 2σ(F<sub>2</sub>)], wR(F<sub>2</sub>), S</b>            | 0.0752, 0.2346, 1.075                                                         |
| <b>No. of reflections</b>                                                       | 3025                                                                          |
| <b>No. of parameters</b>                                                        | 253                                                                           |
| <b>No. of restraints</b>                                                        | 0                                                                             |
| <b>H-atom treatment</b>                                                         | H atoms treated by a mixture of independent and constrained refinement        |
